# Supplementary material
Source: publisher figshare collection journal article supplement (https://gsajournals.figshare.com/ndownloader/files/14515373)
Supplement: Supplementary file 1 [file 14515373]

## Sheet: Sheet1
Male specific up regulated	Mcarcass specific up regulated	Female specific upregulaed	Fcarcass specific upregulaed	Testis specific upregulaed	Ovary specific upregulaed	Gonad specific upregulated
cellular glucose homeostasis	defense response	reproductive process	regulation of transmembrane transport	protein modification by small protein conjugation or removal	regulation of biological process	post-translational protein modification
sperm motility	peptidoglycan catabolic process	reproduction	regulation of ion transmembrane transport	cellular protein metabolic process	regulation of cellular process	protein modification by small protein conjugation or removal
generation of precursor metabolites and energy	glycosaminoglycan catabolic process	sexual reproduction	regulation of ion transport	microtubule-based process	biological regulation	protein deubiquitination
carbohydrate phosphorylation	peptidoglycan metabolic process	cellular response to X-ray	hemolymph coagulation	cellular process	cell differentiation	protein modification process
	aminoglycan catabolic process	cellular response to gamma radiation	coagulation	protein modification by small protein removal	developmental process	protein modification by small protein removal
	monocarboxylic acid metabolic process	response to gamma radiation	hemostasis	protein metabolic process	cellular developmental process	macromolecule modification
	fatty acid biosynthetic process	egg activation	regulation of transmembrane transporter activity	protein modification process	cell cycle	ubiquitin-dependent protein catabolic process
	polysaccharide catabolic process	cellular response to ionizing radiation	regulation of transporter activity	protein deubiquitination	reproductive cellular process	modification-dependent protein catabolic process
	oxidation reduction	response to X-ray	positive regulation of transporter activity	protein localization in organelle	anatomical structure development	modification-dependent macromolecule catabolic process
	calcium-mediated signaling	reproductive cellular process	regulation of ion transmembrane transporter activity	post-translational protein modification	sexual reproduction	proteolysis involved in cellular protein catabolic process
	lipid metabolic process	oogenesis	positive regulation of ion transmembrane transporter activity	sperm motility	post-translational protein modification	cellular protein catabolic process
	glycosaminoglycan metabolic process	cellular response to radiation	polysaccharide metabolic process	macromolecule modification	gamete generation	protein catabolic process
	regulation of synaptic transmission	induction of apoptosis by intracellular signals	chitin metabolic process	microtubule cytoskeleton organization	cell cycle process	macromolecule catabolic process
	regulation of transmission of nerve impulse	DNA damage response, signal transduction resulting in induction of apoptosis	regulation of synaptic activity	protein folding	reproductive developmental process	cellular macromolecule catabolic process
	regulation of synaptic activity	induction of apoptosis	regulation of body fluid levels	glucose homeostasis	regulation of developmental process	microtubule cytoskeleton organization
	fatty acid metabolic process	cell activation	protein homooligomerization	protein polyglutamylation	negative regulation of cellular process	spindle assembly involved in female meiosis
	regulation of neurological system process	female gamete generation	peptidyl-tyrosine dephosphorylation	tubulin complex assembly	multicellular organismal development	cytoskeleton organization
	cuticle hydrocarbon biosynthetic process	multicellular organismal process	regulation of transport	post-chaperonin tubulin folding pathway	cytoskeleton organization	cellular protein metabolic process
	aminoglycan metabolic process	regulation of DNA repair	aminoglycan metabolic process	protein ubiquitination	oogenesis	regulation of cellular component organization
	polysaccharide metabolic process	reproductive developmental process	sensory perception of sound	protein modification by small protein conjugation	system development	regulation of canonical Wnt receptor signaling pathway
	immune system process	gamete generation		ubiquitin-dependent protein catabolic process	female gamete generation	regulation of Wnt receptor signaling pathway
	regulation of system process	germ cell programmed cell death		anaphase-promoting complex-dependent proteasomal ubiquitin-dependent protein catabolic process	protein modification process	female meiosis
	defense response to bacterium	single fertilization		modification-dependent protein catabolic process	negative regulation of biological process	female meiosis I
	negative regulation of cell growth	cellular response to abiotic stimulus		protein localization in mitochondrion	regulation of cellular component organization	spindle assembly involved in meiosis
	wax biosynthetic process	regulation of binding		protein targeting to mitochondrion	reproductive process in a multicellular organism	protein amino acid autophosphorylation
	wax metabolic process	fertilization		modification-dependent macromolecule catabolic process	macromolecule modification	regulation of cell development
	ionotropic glutamate receptor signaling pathway	developmental process		cellular glucose homeostasis	reproductive process	protein metabolic process
	response to other organism	induction of programmed cell death		protein import	microtubule cytoskeleton organization	negative regulation of cellular process
	long-chain fatty-acyl-CoA metabolic process	positive regulation of transcription factor activity		cilium movement	spindle organization	regulation of cell differentiation
	positive regulation of lipid storage	positive regulation of transcription regulator activity		cellular response to unfolded protein	multicellular organism reproduction	maintenance of protein location in cell
	glutamate signaling pathway	reproductive process in a multicellular organism		carbohydrate homeostasis	cell cycle phase	cellular macromolecule metabolic process
	response to stress	positive regulation of DNA binding		proteolysis involved in cellular protein catabolic process	reproduction	maintenance of location in cell
	negative regulation of immune response	multicellular organism reproduction		cellular protein catabolic process	organ development	maintenance of protein location
	organic acid biosynthetic process	activation of caspase activity		protein catabolic process	organelle organization	microtubule-based process
	carboxylic acid biosynthetic process	positive regulation of binding		cellular macromolecule metabolic process	cell development	negative regulation of biological process
	response to bacterium	nuclear division		spindle assembly involved in female meiosis	regulation of cell communication	protein depolymerization
	negative regulation of immune system process	positive regulation of caspase activity			M phase	microtubule anchoring
	response to biotic stimulus	response to ionizing radiation			chromosome organization	regulation of nervous system development
	fatty-acyl-CoA metabolic process	karyosome formation			cellular component organization	regulation of developmental process
	carbohydrate metabolic process	regulation of transcription factor activity			regulation of signaling pathway	maintenance of location
	thioester metabolic process	regulation of transcription regulator activity			protein modification by small protein conjugation or removal	cell cycle process
	acyl-CoA metabolic process	cytokinetic cell separation			regulation of cell differentiation	organelle organization
	response to protozoan	organelle fission			mitotic cell cycle	histone deubiquitination
	10-formyltetrahydrofolate metabolic process	regulation of caspase activity			cell division	miRNA catabolic process
	10-formyltetrahydrofolate catabolic process	germ cell migration			multicellular organismal process	spindle assembly involved in female meiosis I
	pteridine and derivative catabolic process	regulation of DNA binding			spindle assembly	female meiosis II
	folic acid and derivative catabolic process	regulation of DNA metabolic process			modification-dependent macromolecule catabolic process	M phase of meiotic cell cycle
	defense response to protozoan				ubiquitin-dependent protein catabolic process	meiosis
	regulation of neuronal synaptic plasticity in response to neurotrophin				modification-dependent protein catabolic process	spindle assembly
	negative regulation of cell size				embryonic development	cellular component organization
	second-messenger-mediated signaling				macromolecule localization	pole cell development
	carbohydrate catabolic process				regulation of signal transduction	regulation of multicellular organismal process
					regulation of anatomical structure morphogenesis	cellular catabolic process
					regulation of embryonic development	meiotic spindle organization
					regulation of signaling process	organelle localization
					organelle assembly	negative regulation of developmental process
					protein catabolic process	protein autoubiquitination
					positive regulation of biological process	positive regulation of canonical Wnt receptor signaling pathway
					anatomical structure morphogenesis	MAPKKK cascade
					protein localization	actin filament organization
					proteolysis involved in cellular protein catabolic process	regulation of protein metabolic process
					cellular protein catabolic process	assembly of actomyosin apparatus involved in cell cycle cytokinesis
					cell motility	cytokinesis, actomyosin contractile ring assembly
					regulation of cellular component biogenesis	protein amino acid phosphorylation
					microtubule-based process	protein ubiquitination
					regulation of cell development	regulation of biological process
					anatomical structure formation involved in morphogenesis	regulation of cellular process
					ovarian follicle cell development	positive regulation of Wnt receptor signaling pathway
					negative regulation of cell communication	cytokinetic process
					cell migration	miRNA metabolic process
					localization of cell	muscle cell fate specification
					positive regulation of cellular process	macromolecule metabolic process
					protein deubiquitination	germline ring canal formation
					intracellular signaling pathway	intercellular bridge organization
					protein modification by small protein removal	cell fate commitment
					cellular macromolecule catabolic process	biological regulation
					negative regulation of signaling pathway	chromatin silencing
					protein amino acid phosphorylation	negative regulation of gene expression, epigenetic
					wing disc development	regulation of cellular component biogenesis
					negative regulation of developmental process
					regulation of metabolic process
					regulation of organelle organization
					macromolecule catabolic process
					cellular localization
					neurogenesis
					generation of neurons
					actin filament-based process
					nervous system development
					actin cytoskeleton organization
					imaginal disc development
					regulation of protein metabolic process
					sensory organ development
					meiotic cell cycle
					regulation of translation
					negative regulation of cell differentiation
					regulation of Ras protein signal transduction
					locomotion
					regulation of neurogenesis
					regulation of nervous system development
					negative regulation of macromolecule metabolic process
					negative regulation of metabolic process
					asymmetric protein localization
					regulation of photoreceptor cell differentiation
					spindle assembly involved in female meiosis
					intracellular signal transduction
					maintenance of protein location in cell
					regulation of mitotic cell cycle
					regulation of cell shape
					protein ubiquitination
					regulation of cell morphogenesis
					maintenance of location in cell
					organelle localization
					regulation of small GTPase mediated signal transduction
					posttranscriptional regulation of gene expression
					regulation of cytoskeleton organization
					regulation of multicellular organismal process
					hemocyte migration
					regulation of cellular protein metabolic process
					regulation of neuron differentiation
					gene silencing
					spindle assembly involved in meiosis
					assembly of actomyosin apparatus involved in cell cycle cytokinesis
					cytokinesis, actomyosin contractile ring assembly
					actin filament organization
					negative regulation of cellular metabolic process
					cellular component assembly
					organ morphogenesis
					regulation of gene expression, epigenetic
					establishment of localization in cell
					chromatin organization
					embryonic development ending in birth or egg hatching
					regulation of cell cycle
					M phase of meiotic cell cycle
					meiosis
					pole cell development
					dendritic spine development
					dendritic spine morphogenesis
					protein modification by small protein conjugation
					maintenance of protein location
					actin cytoskeleton reorganization
					establishment of organelle localization
					embryonic development via the syncytial blastoderm
					regulation of cellular metabolic process
					negative regulation of macromolecule biosynthetic process
					oocyte differentiation
					mitotic cell cycle, embryonic
					establishment of spindle localization
					DNA conformation change
					regulation of Rho protein signal transduction
					post-embryonic development
					cytokinesis after mitosis
					ovarian follicle cell migration
					spindle localization
					eye development
					regulation of programmed cell death
					stem cell differentiation
					establishment of spindle orientation
					small GTPase mediated signal transduction
					embryonic hemopoiesis
					germ cell development
					cellular component morphogenesis
					mitotic spindle organization
					cellular protein metabolic process
					negative regulation of biosynthetic process
					negative regulation of cellular biosynthetic process
					microtubule anchoring
					instar larval or pupal development
					female meiosis
					metamorphosis
					regionalization
					microtubule organizing center organization
					nucleus organization
					cellular component biogenesis
					negative regulation of gene expression
					regulation of apoptosis
					regulation of cell projection organization
					DNA packaging
					chromatin modification
					programmed cell death
					regulation of macromolecule metabolic process
					post-embryonic morphogenesis
					stem cell maintenance
					stem cell development
					germarium-derived egg chamber formation
					imaginal disc-derived wing morphogenesis
					establishment of meiotic spindle localization
					spindle astral microtubule organization
					spindle astral microtubule nucleation
					peptidyl-serine phosphorylation
					negative regulation of gene expression, epigenetic
					chromatin silencing
					positive regulation of ERK1 and ERK2 cascade
					cellular component movement
					regulation of cell division
					compound eye development
					cytokinetic process
					intracellular protein kinase cascade
					regulation of actin cytoskeleton organization
					regulation of actin filament-based process
					nuclear division
					appendage development
					post-embryonic appendage morphogenesis
					embryonic organ development
					covalent chromatin modification
					histone modification
					regulation of cell death
					male pronucleus assembly
					negative regulation of nitrogen compound metabolic process
					maintenance of location
					cell death
					peptidyl-serine modification
					meiotic spindle organization
					ubiquitin-dependent protein catabolic process via the N-end rule pathway
					embryonic body morphogenesis
					wing disc morphogenesis
					nucleosome assembly
					eggshell chorion assembly
					regulation of Wnt receptor signaling pathway
					cellular macromolecule metabolic process
					positive regulation of signal transduction
					intracellular transport
					actin filament reorganization involved in cell cycle
					syncytial blastoderm mitotic cell cycle
					negative regulation of nucleobase, nucleoside, nucleotide and nucleic acid metabolic process
					regulation of primary metabolic process
					cell morphogenesis involved in differentiation
					pattern specification process
					mitosis
					border follicle cell migration
					positive regulation of signaling process
					imaginal disc-derived appendage development
					regulation of R7 cell differentiation
					tissue development
					cellular process
					instar larval or pupal morphogenesis
					centrosome cycle
					cell morphogenesis
					apical protein localization
					cytoplasmic microtubule organization
					cystoblast division
					regulation of response to stress
					positive regulation of sevenless signaling pathway
					asymmetric cell division
					appendage morphogenesis
					regulation of canonical Wnt receptor signaling pathway
					positive regulation of cell communication
					regulation of gene expression
					signal transduction
					nuclear migration
					establishment of nucleus localization
					centrosome organization
					stem cell division
					organelle fission
					post-embryonic organ development
					signal transmission via phosphorylation event
					positive regulation of intracellular protein kinase cascade
					adherens junction organization
					male meiosis
					pole cell formation
					regulation of cytokinesis
					death
					cellularization
					positive regulation of signaling pathway
					M phase of mitotic cell cycle
					gastrulation
					cytokinesis
					cell cycle comprising mitosis without cytokinesis
					SCF-dependent proteasomal ubiquitin-dependent protein catabolic process
					protein targeting to vacuole
					ovarian nurse cell to oocyte transport
					single fertilization
					nucleus localization
					regulation of lamellipodium assembly
					regulation of cellular component size
					gland morphogenesis
					salivary gland morphogenesis
					imaginal disc-derived appendage morphogenesis
					chromatin assembly
					establishment of mitotic spindle localization
					peptidyl-amino acid modification
					tissue morphogenesis
					negative regulation of RNA metabolic process
					positive regulation of Wnt receptor signaling pathway
					regulation of catalytic activity
					regulation of cell projection assembly
					regulation of embryonic cell shape
					negative regulation of translation
					localization
					regulation of growth
					exocrine system development
					salivary gland development
					histone phosphorylation
					protein depolymerization
					cell competition in a multicellular organism
					cell fate commitment
					establishment or maintenance of cell polarity
					oocyte growth
					chromosome segregation
					chorion-containing eggshell formation
					positive regulation of wound healing
					regulation of sevenless signaling pathway
					pseudocleavage
					pseudocleavage involved in syncytial blastoderm formation
					sperm chromatin decondensation
					cell projection assembly
					establishment of cell polarity
					immune effector process
					regulation of protein kinase activity
					establishment of protein localization
					regulation of cell proliferation
					dendrite development
					eggshell formation
					gland development
					regulation of molecular function
					encapsulation of foreign target
					imaginal disc morphogenesis
					post-embryonic organ morphogenesis
					establishment of mitotic spindle orientation
					growth of a germarium-derived egg chamber
					regulation of phosphorus metabolic process
					regulation of phosphate metabolic process
					oocyte development
					regulation of transferase activity
					regulation of kinase activity
					positive regulation of canonical Wnt receptor signaling pathway
					MAPKKK cascade
					positive regulation of MAPKKK cascade
					regulation of filopodium assembly
					embryonic morphogenesis
					negative regulation of transcription, DNA-dependent
					protein transport
					epithelium development
					regulation of localization
					ovarian fusome organization
					induction of programmed cell death
					regulation of imaginal disc growth
					regulation of ERK1 and ERK2 cascade
					germline ring canal formation
					intercellular bridge organization
					regulation of wound healing
					hemopoiesis
					negative regulation of transcription
					negative regulation of response to stimulus
					immune system development
					hemopoietic or lymphoid organ development
					positive regulation of programmed cell death
					negative regulation of compound eye cone cell fate specification
					regulation of pigment cell differentiation
					negative regulation of pigment cell differentiation
					histone H4-K20 methylation
					operant conditioning
					protein targeting to lysosome
					regulation of chromatin binding
					peripheral nervous system neuron axonogenesis
					fertilization
					epithelial cell morphogenesis
					negative regulation of signal transduction
					asymmetric neuroblast division
					centrosome separation
					somatic stem cell division
					apical constriction
					regulation of intracellular protein kinase cascade
					regulation of protein localization
					epithelial cell development
					chromatin assembly or disassembly
					cell cycle cytokinesis
					negative regulation of signaling process
					zonula adherens assembly
					oocyte morphogenesis
					signaling pathway
					asymmetric protein localization involved in cell fate determination
					centrosome localization
					Ras protein signal transduction
					actin-mediated cell contraction
					regulation of oocyte development
					regulation of pole plasm oskar mRNA localization
					locomotor rhythm
					neuroblast division
